# Supplementary material
Source: Springer Nature journal article supplement (https://www.springermedizin.de/resource/supplementary/12885_2005_477_MOESM1_ESM.pdf/9469560)

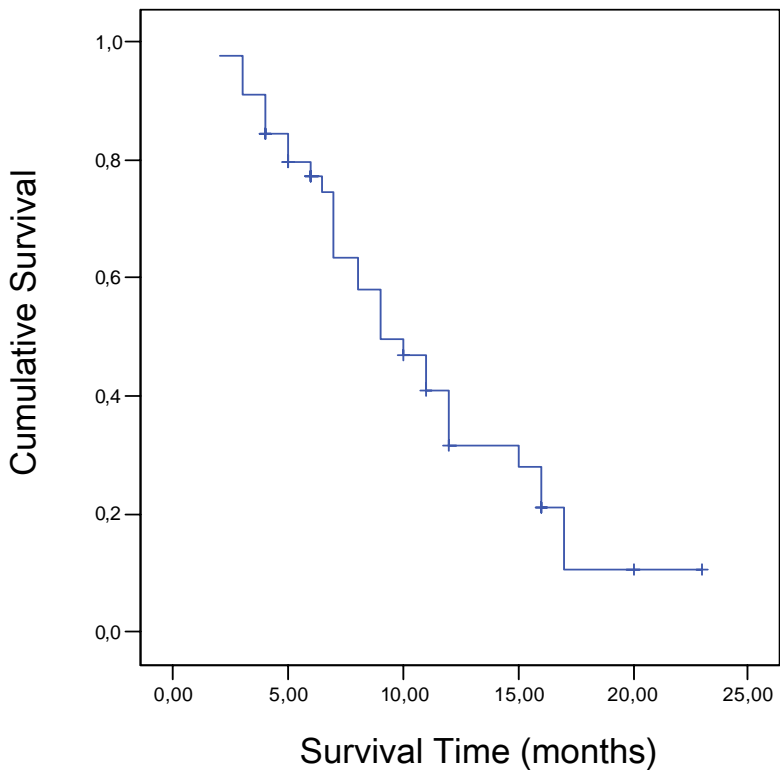

Median OS (95% C.I.): 9,00 (6,18 - 11,82)

Supplement: MOESM1 [file 9469560]
